# Supplementary material for: Sex-specific dmrt1 and cyp19a1 methylation and alternative splicing in gonads of the protandrous hermaphrodite barramundi
Source: PubMed Central journal article supplement (PMC6143260; doi:10.1371/journal.pone.0204182), 2018-09-18
Supplement: pone.0204182.s001.pdf [file pone.0204182.s001.pdf]

Supporting information.

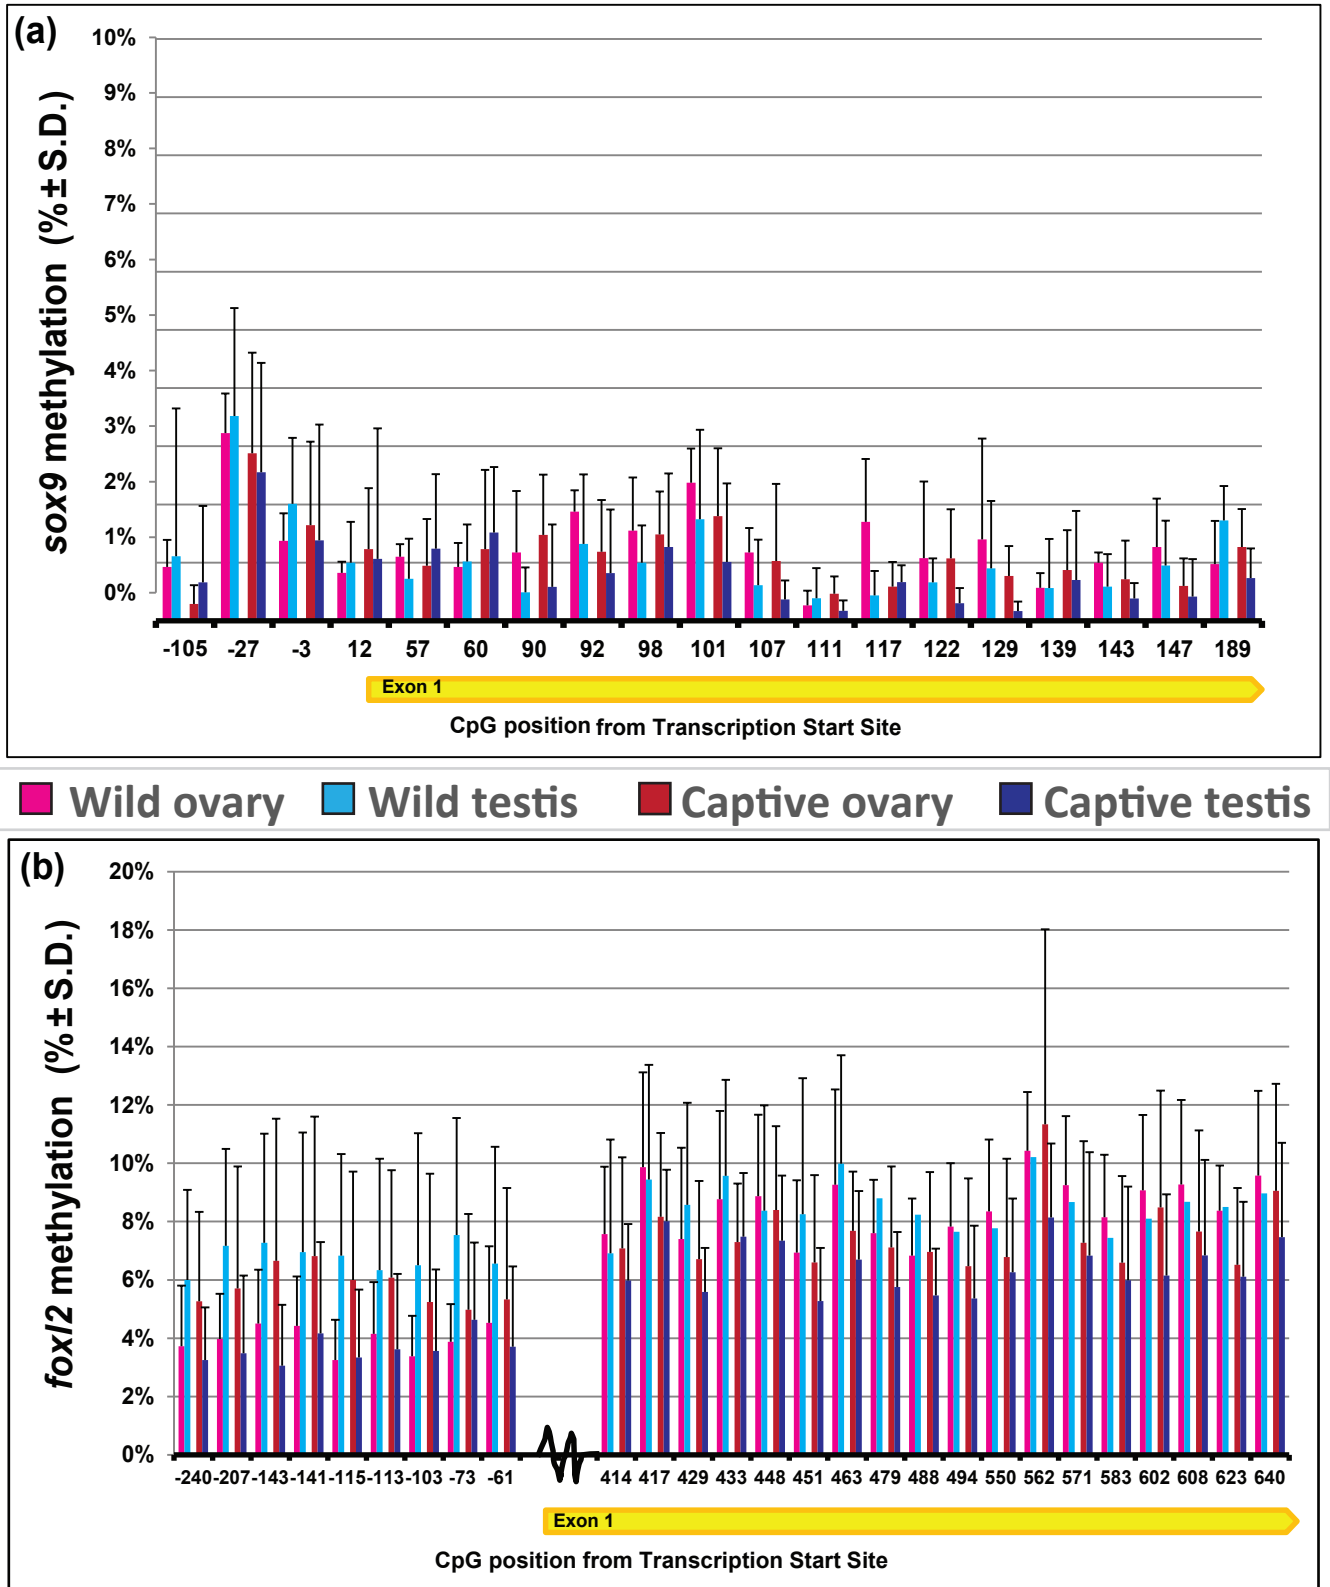

**S1 Fig.** Non-biased hypomethylated genes (a) *sox9* and (b) *foxl2* (mean %  $\pm$  S.D.) of barramundi *Lates calcarifer* within testes (n = 10) and ovaries (n = 4) of wild caught individuals and testes (n = 14) and ovaries (n=14) of captive broodstock, as obtained by bisulfite amplicon next-generation sequencing.
